# Supplementary material for: Collagen triple helix repeat containing 1 is a new promigratory marker of arthritic pannus
Source: Springer Nature journal article supplement (doi:10.1186/s13075-016-1067-1), 2016-07-18

Additional File-1  
Figure

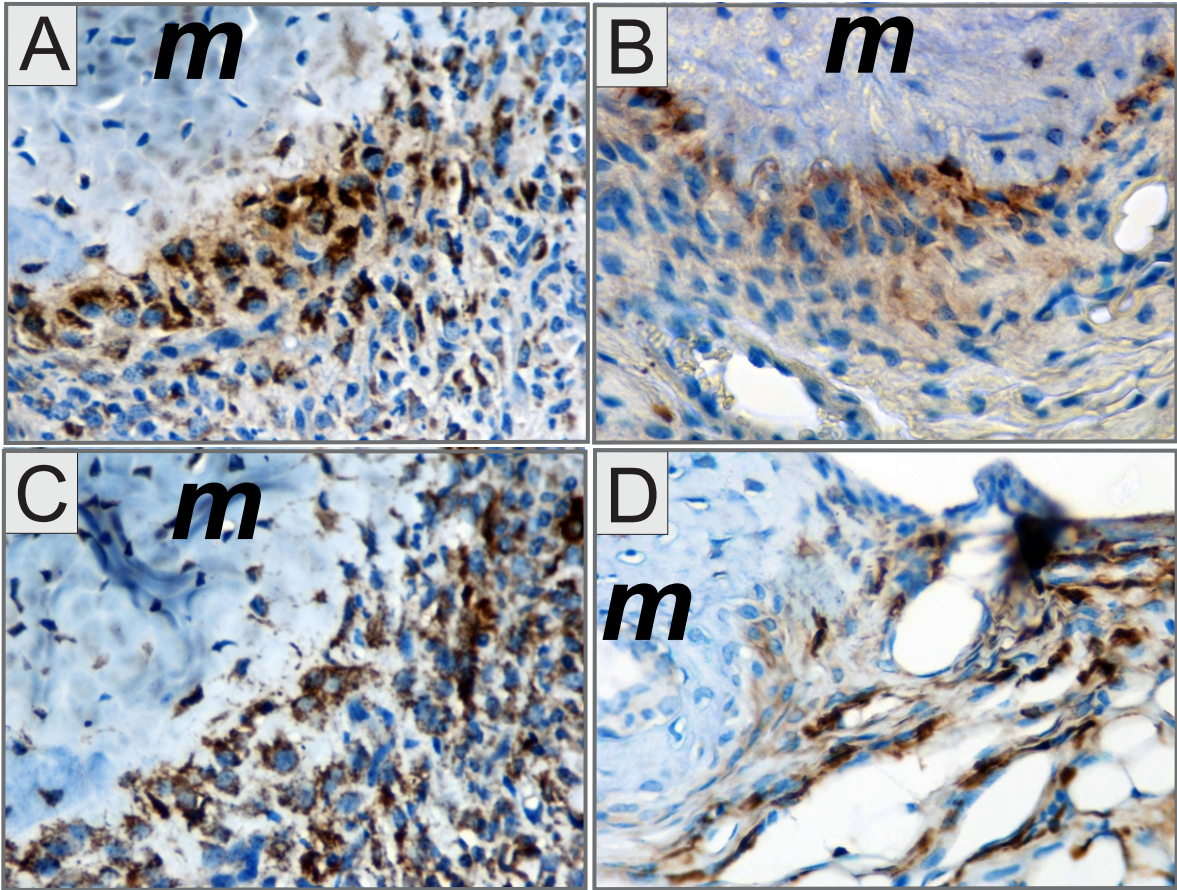

Supplement: MOESM1 [file 10503034]
